# Supplementary material
Source: HighWire-hosted journal article supplement (http://www.jrheum.org/highwire/filestream/33978/field_highwire_adjunct_files/0/171443DataSuppl.pdf)
Supplement: 171443DataSuppl.pdf [file 171443DataSuppl.pdf]

**ONLINE SUPPLEMENTARY DATA**

**Supplementary Figure 1.** Frequency of age at diagnosis (A), onset age of Raynaud phenomenon (B) and onset age of scleroderma (C) in patients with systemic sclerosis in each age decade.

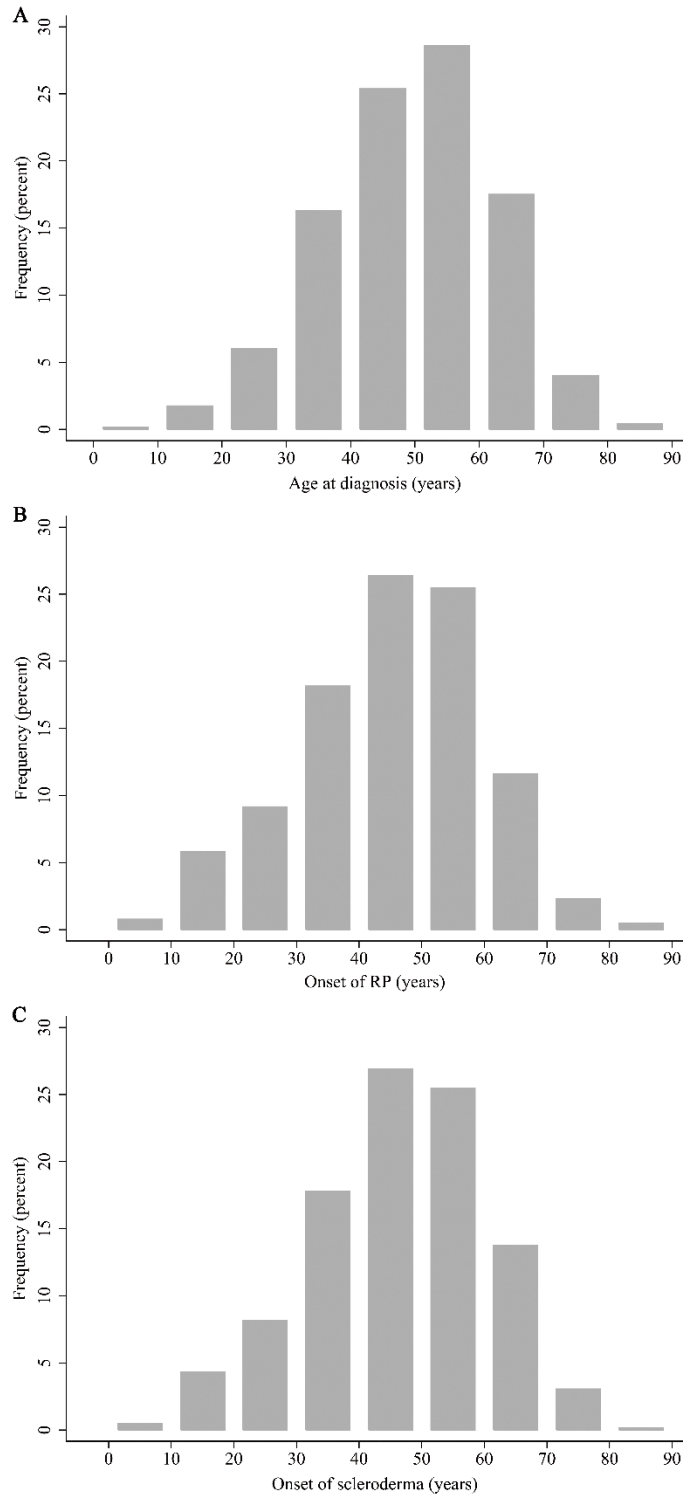

**Supplementary Table 1.** Type of malignancies in Korean patients with systemic sclerosis.

| Type                                | SSc patients with malignancy (n=46) |
|-------------------------------------|-------------------------------------|
| Lung cancer, n (%)                  | 11 (23.9%)                          |
| Stomach cancer, n (%)               | 6 (13%)                             |
| Breast cancer, n (%)                | 6 (13%)                             |
| Thyroid cancer, n (%)               | 5 (10.9%)                           |
| Cervical cancer, n (%)              | 4 (8.7%)                            |
| Lymphoma, n (%)                     | 3 (6.5%)                            |
| Colon cancer, n (%)                 | 2 (4.3%)                            |
| Tongue cancer, n (%)                | 2 (4.3%)                            |
| Duodenal cancer, n (%)              | 1 (2.2%)                            |
| Malignancy of unknown origin, n (%) | 1 (2.2%)                            |
| Prostatic cancer, n (%)             | 1 (2.2%)                            |
| Rectal cancer, n (%)                | 1 (2.2%)                            |
| Renal cell cancer, n (%)            | 1 (2.2%)                            |
| Lung and thyroid cancer, n (%)      | 1 (2.2%)                            |
| Lymphoma and colon cancer, n (%)    | 1 (2.2%)                            |

**Supplementary Table 2.** Differences in disease presentation according to the presence of anti-Scl70 antibody.

| Characteristics                            | positive (n = 302) | negative (n = 408) | p-value |
|--------------------------------------------|--------------------|--------------------|---------|
| Female, n (%)                              | 266 (88.1%)        | 348 (85.3%)        | 0.318   |
| dcSSc, n (%)                               | 152 (50.3%)        | 94 (23.0%)         | <0.001  |
| BMI, kg/m <sup>2</sup> , mean ± SD         | 21.5 ± 3.7         | 22.9 ± 18.0        | 0.255   |
| Age at diagnosis, years, mean ± SD         | 45.3 ± 13.9        | 51.5 ± 12.2        | <0.001  |
| Onset age of RP, years, mean ± SD          | 39.8 ± 15          | 48 ± 13.6          | <0.001  |
| Onset age of scleroderma, years, mean ± SD | 41.5 ± 14.4        | 49.2 ± 13.4        | <0.001  |
| Observation period, years, mean ± SD       | 6.4 ± 5.7          | 6.2 ± 5.5          | 0.729   |
| Residence in urban area, n (%)             | 240 (79.7%)        | 308 (76.0%)        | 0.273   |
| mRSS, mean ± SD                            | 10.2 ± 7.7         | 6.6 ± 5.9          | <0.001  |
| GERD, n (%)                                | 105 (35.1%)        | 119 (29.5%)        | 0.12    |
| ILD, n (%)                                 | 223 (74.1%)        | 158 (38.9%)        | <0.01   |
| Cardiovascular involvement, n (%)          | 34 (11.9%)         | 39 (10.1%)         | 0.531   |
| PAH, n (%)                                 | 38 (14.8%)         | 53 (14.7%)         | 0.982   |
| Isolated PAH, n (%)                        | 1 (0.3%)           | 11 (2.7%)          | 0.017   |
| Renal crisis, n (%)                        | 10 (3.3%)          | 7 (1.7%)           | 0.216   |
| Cancer, n (%)                              | 15 (5.0%)          | 29 (7.1%)          | 0.272   |

|                                       |                  |                  |        |
|---------------------------------------|------------------|------------------|--------|
| Death, n (%)                          | 35 (11.6%)       | 19 (4.7%)        | 0.001  |
| Pulmonary function test               |                  |                  |        |
| FVC (% predicted), mean $\pm$ SD      | 72.8 $\pm$ 17.9  | 83.0 $\pm$ 20.1  | <0.001 |
| FEV1 (% predicted), mean $\pm$ SD     | 77.3 $\pm$ 18.7  | 87.7 $\pm$ 21.4  | <0.001 |
| FEV1/FVC (% predicted), mean $\pm$ SD | 107.5 $\pm$ 14.9 | 106.5 $\pm$ 12.6 | 0.371  |
| DLco (% predicted), mean $\pm$ SD     | 61.7 $\pm$ 20.6  | 68.6 $\pm$ 22.4  | <0.001 |
| Systolic PAP, mmHg mean $\pm$ SD      | 31.4 $\pm$ 16.2  | 32.8 $\pm$ 16.8  | 0.363  |

---

dcSSc: diffuse cutaneous systemic sclerosis; body mass index; RP: Raynaud's phenomenon;

mRSS: modified Rodnan skin score; GERD: gastroesophageal reflux disease; ILD: Interstitial lung

disease; PAH: Pulmonary arterial hypertension; FVC: forced vital capacity; FEV1: forced

expiratory volume in 1 second; DLco: diffusing capacity for carbon monoxide; PAP: pulmonary

arterial pressure.

**Supplementary Figure 2.** Comparisons of survival curve in patients with systemic sclerosis according to the presence of cardiovascular involvement (A) and ant-Scl70 antibody (B).

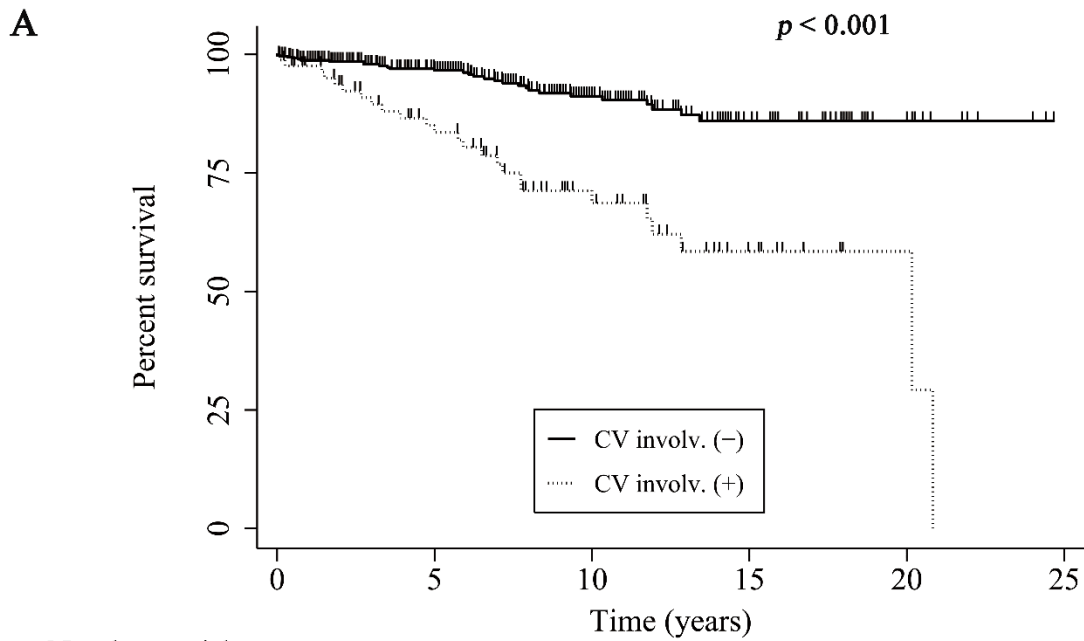

Number at risk

|               |     |     |     |    |    |   |
|---------------|-----|-----|-----|----|----|---|
| CV invol. (-) | 529 | 267 | 124 | 46 | 14 | 0 |
| CV invol. (+) | 84  | 56  | 27  | 10 | 2  | 0 |

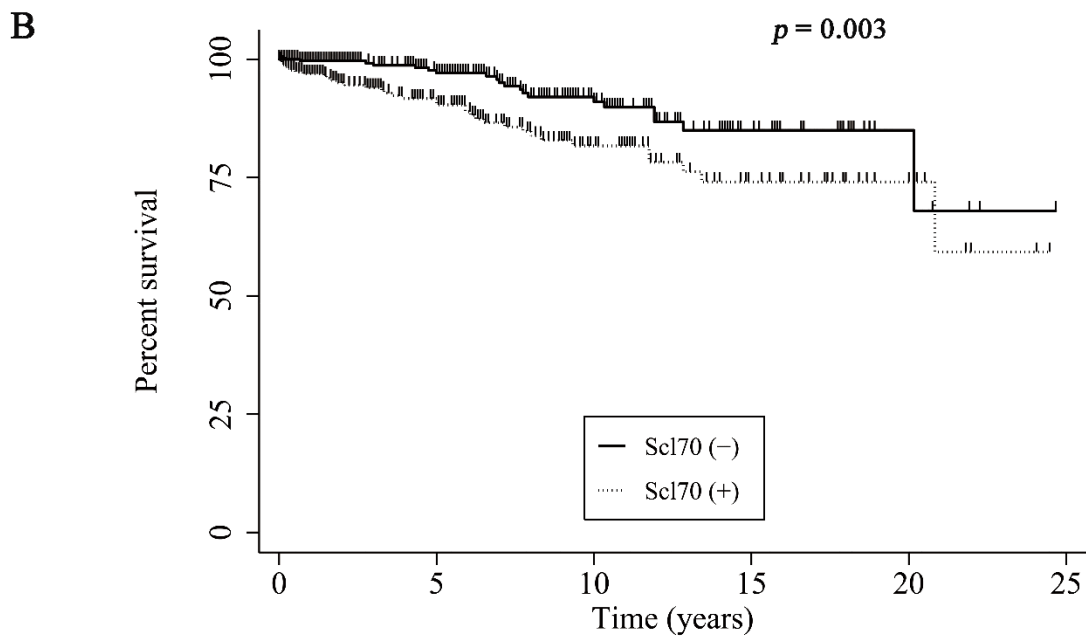

Number at risk

|           |     |     |    |    |    |   |
|-----------|-----|-----|----|----|----|---|
| Scl70 (-) | 345 | 177 | 86 | 26 | 5  | 0 |
| Scl70 (+) | 273 | 139 | 62 | 26 | 11 | 0 |
